# Supplementary material for: Development of an inexpensive matrix-assisted laser desorption—time of flight mass spectrometry method for the identification of endophytes and rhizobacteria cultured from the microbiome associated with maize
Source: PeerJ journal article supplement (doi:10.7717/peerj.11359), 2021-05-28

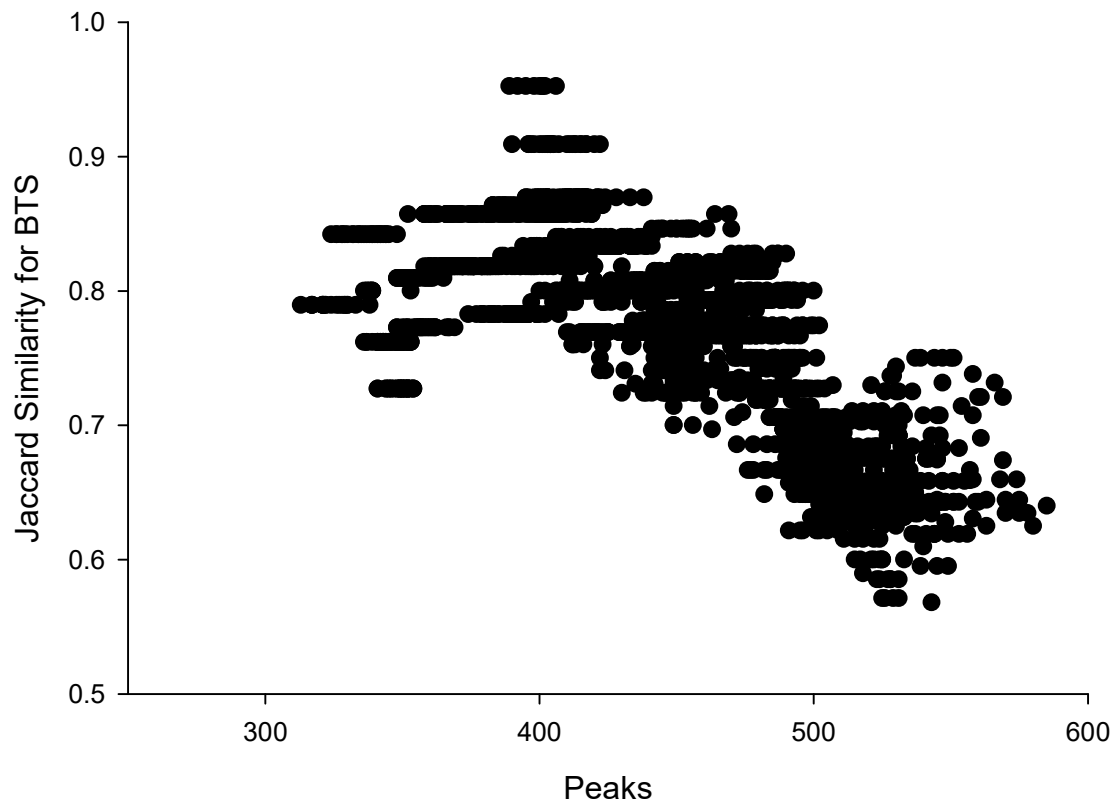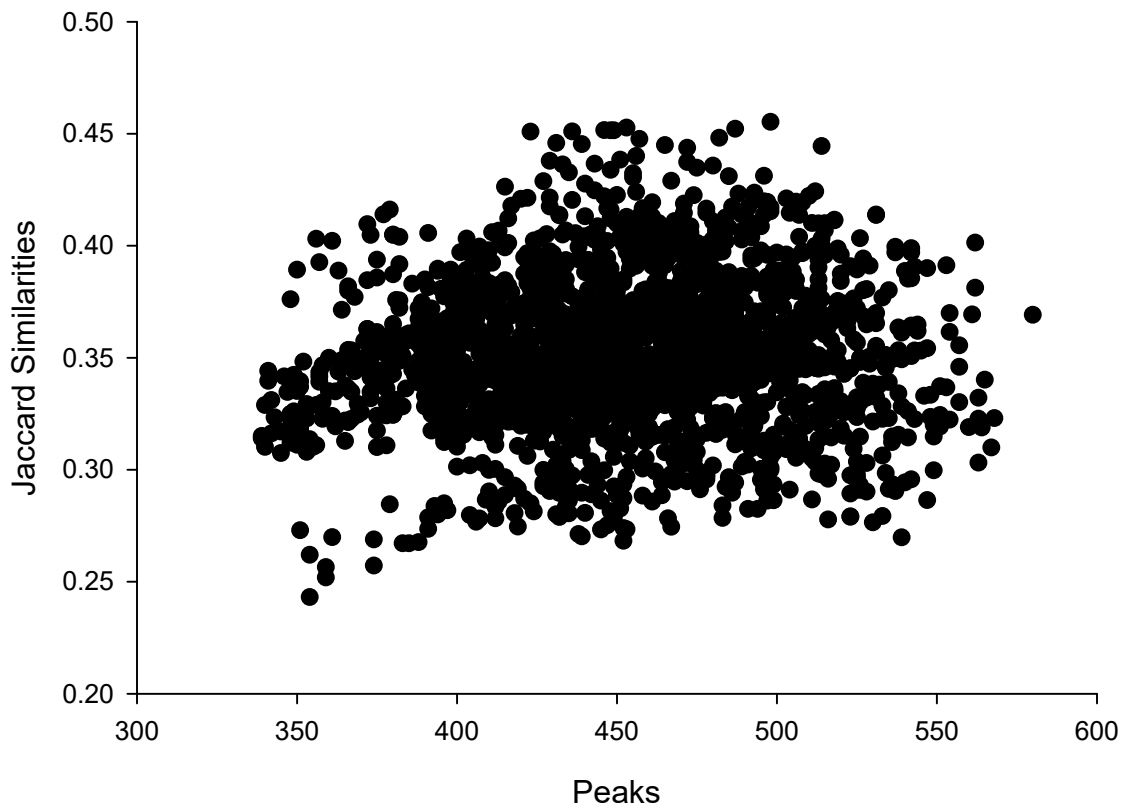

Supplement: Fig_S2_Jaccards.pdf [file Fig_S2_Jaccards.pdf]
