# Supplementary material for: Development of an inexpensive matrix-assisted laser desorption—time of flight mass spectrometry method for the identification of endophytes and rhizobacteria cultured from the microbiome associated with maize
Source: PeerJ journal article supplement (doi:10.7717/peerj.11359), 2021-05-28
Supplement: Fig_S3_VarietyVenn.pdf [file Fig_S3_VarietyVenn.pdf]

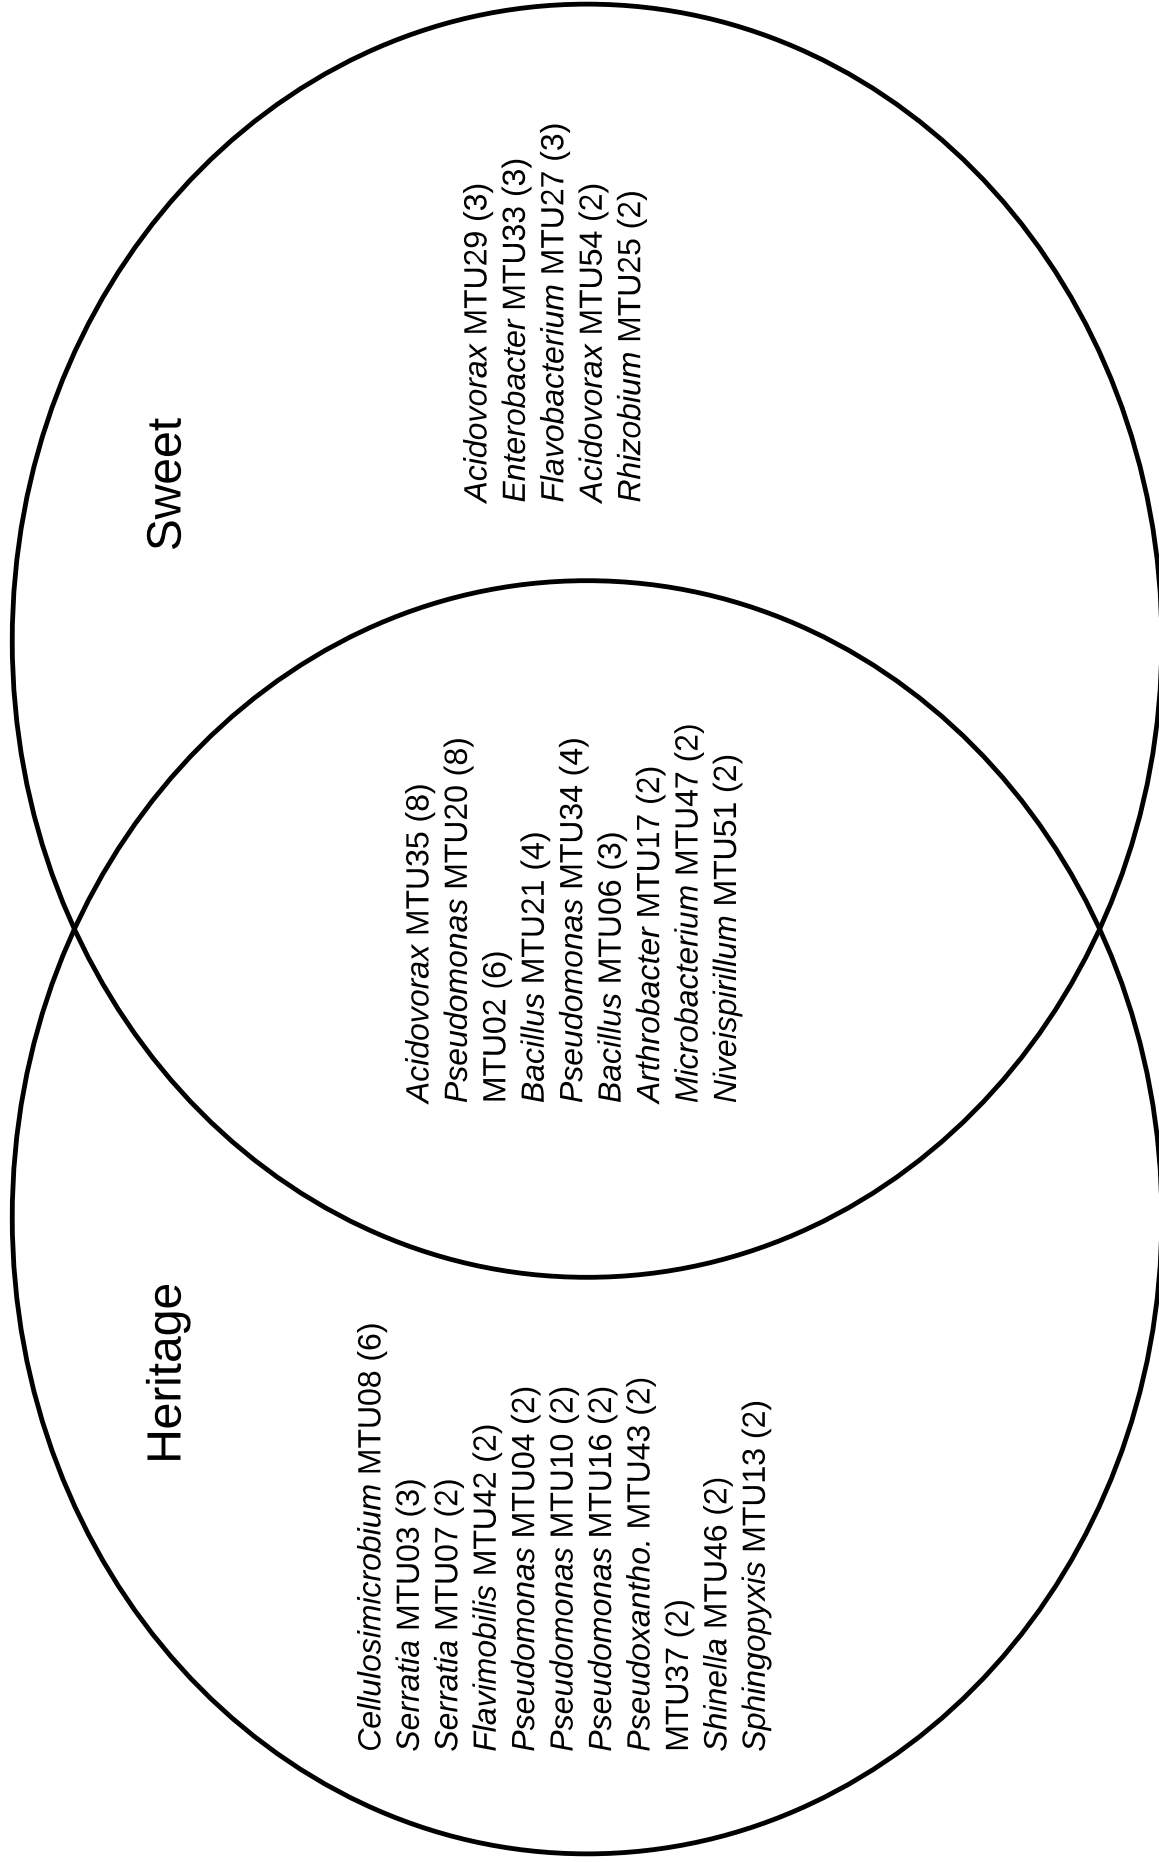

## Heritage

*Cellulosimicrobium* MTU08 (6)  
*Serratia* MTU03 (3)  
*Serratia* MTU07 (2)  
*Flavimobilis* MTU42 (2)  
*Pseudomonas* MTU04 (2)  
*Pseudomonas* MTU10 (2)  
*Pseudomonas* MTU16 (2)  
*Pseudoxantho.* MTU43 (2)  
MTU37 (2)  
*Shinella* MTU46 (2)  
*Sphingopyxis* MTU13 (2)

## Sweet

*Acidovorax* MTU35 (8)  
*Pseudomonas* MTU20 (8)  
MTU02 (6)  
*Bacillus* MTU21 (4)  
*Pseudomonas* MTU34 (4)  
*Bacillus* MTU06 (3)  
*Arthrobacter* MTU17 (2)  
*Microbacterium* MTU47 (2)  
*Niveispirillum* MTU51 (2)

*Acidovorax* MTU29 (3)  
*Enterobacter* MTU33 (3)  
*Flavobacterium* MTU27 (3)  
*Acidovorax* MTU54 (2)  
*Rhizobium* MTU25 (2)
